# Supplementary material for: Efficient Detection of Mediterranean β-Thalassemia Mutations by Multiplex Single-Nucleotide Primer Extension
Source: PubMed Central journal article supplement (PMC3482202; doi:10.1371/journal.pone.0048167), 2012-10-26
Supplement: pone.0048167.s003.pdf [file pone.0048167.s003.pdf]

**Table S1.** Single-nucleotide primer extension assay: characterization of primers and products.

| Primer/product number | Primer/product name | Primer size, nt | Complementary sequence size, nt <sup>a</sup> | T <sub>m</sub> , °C <sup>b</sup> | Secondary structure, dG, kcal/mol <sup>c</sup> | Homodimer, dG, kcal/mol <sup>d</sup> | Heterodimer with primer(s), dG, kcal/mol <sup>e</sup> | Normal peak <sup>f</sup> | Mutant peak <sup>g</sup> |
|-----------------------|---------------------|-----------------|----------------------------------------------|----------------------------------|------------------------------------------------|--------------------------------------|-------------------------------------------------------|--------------------------|--------------------------|
| 1                     | IVS-I-1+            | 17              | 17                                           | 63.6                             | -0.34                                          | -7.8                                 | IVS-I-6+, -8.2                                        | <b>G</b> 23.3            | <b>A</b> 26.0            |
| 2                     | Codon 8-            | 20              | 20                                           | 59.4                             | 1.08                                           | -1.8                                 | IVS-I-110+, -6.0<br>IVS-I-6+, -6.0<br>IVS-I-1+, -6.0  | <b>T</b> 27.3            | <b>C</b> 23.8            |
| 3                     | IVS-I-110-          | 24              | 24                                           | 61.1                             | 0.56                                           | -4.0                                 | IVS-II-745-, -5.2                                     | <b>C</b> 28.6            | <b>T</b> 30.0            |
| 4                     | IVS-I-110+          | 26              | 26                                           | 59.0                             | -1.46                                          | -3.4                                 | Codon 6/S-, -4.4<br>Codon 5-, -4.4                    | <b>G</b> 29.3            | <b>A</b> 31.4            |
| 5                     | IVS-I-1-            | 30              | 30                                           | 60.8                             | 1.55 (E)                                       | -0.1 (E)                             | IVS-I-6+, -4.2                                        | <b>C</b> 32.5            | <b>T</b> 34.2            |
| 6                     | Codon 39-           | 35              | 26                                           | 62.4                             | 0.13                                           | -1.9                                 | IVS-I-110-, -4.2                                      | <b>G</b> 35.7            | <b>A</b> 37.7            |
| 7                     | IVS-I-6+            | 36              | 18                                           | 63.9                             | -1.53                                          | -8.6                                 | IVS-I-110-, -4.5                                      | <b>T</b> 41.1            | <b>C</b> 39.3            |
| 8                     | Codon 5+            | 39              | 24                                           | 63.8                             | 0.18                                           | -8.1                                 | Codon 6/S+, -8.6                                      | <b>C</b> 41.3            | <b>G</b> 40.6            |
| 9                     | Codon 6/S+          | 41              | 24                                           | 63.6                             | 0.18                                           | -8.1                                 | IVS-I-110-, -4.6                                      | <b>A</b> 44.3            | <b>G</b> 42.6            |
| 10                    | IVS-II-745+         | 44              | 28                                           | 59.0                             | -0.10                                          | -3.4                                 | Codon 39+, -5.2                                       | <b>C</b> 45.8            | <b>G</b> 45.2            |
| 11                    | Codon 6/S-          | 48              | 21                                           | 59.8                             | -0.19                                          | -1.7                                 | Codon 39+, -3.7                                       | <b>T</b> 49.1            | <b>C</b> 48.1            |
| 12                    | Codon 5-            | 50              | 22                                           | 59.2                             | 1.34                                           | -1.0                                 | Codon 39+, -3.7                                       | <b>A</b> 50.0            | <b>G</b> 49.2            |
| 13                    | Codon 39+           | 52              | 25                                           | 69.9                             | 0.18 (E)                                       | -1.6 (E)                             | IVS-I-110-, -4.6                                      | <b>C</b> 52.7            | <b>T</b> 53.7            |
| 14                    | IVS-I-6-            | 54              | 30                                           | 61.8                             | 2.01                                           | 0.1                                  | IVS-I-6+, -4.2                                        | <b>A</b> 54.9            | <b>G</b> 54.1            |
| 15                    | IVS-II-745-         | 58              | 32                                           | 60.8                             | 0.36                                           | -3.0                                 | IVS-I-6+, -4.4 (E)<br>Codon 39+, -4.4                 | <b>G</b> 56.5            | <b>C</b> 56.5            |

<sup>a</sup> Size of sequence complementary to template DNA (= primer size – size of poly(C) tail)

<sup>b</sup> Melting temperature for complementary sequence calculated using RaW; T<sub>m</sub> conditions: Salt Concentration 0.05 M; Oligo Concentration 0.1 μM; Calculation Method Go-Oli-Go

<sup>c</sup> Secondary structure predictions made using the mfold server with Folding temperature set at 50°C and Ionic conditions: [Na<sup>+</sup>] at 0.05 M, [Mg<sup>++</sup>] at 0.0025 M; dG is the free energy released (negative values) or absorbed (positive values) in the process of forming the most favored secondary structure; (E) indicates that the structure is extendable, i.e. the 3'-end nucleotide is included in the hairpin stem

<sup>d</sup> Dimer predictions made using the UNAFold server with temperature set at 50°C, [Na<sup>+</sup>] = 0.05 M, [Mg<sup>++</sup>] = 0.0025 M, Strand concentration at 2.4 μM; (E) indicates extendability

<sup>e</sup> Dimer predictions as detailed in footnote d; the dimer with the lowest dG is listed; second lowest is listed if the lowest combination is already presented; (E) indicates extendability

<sup>f</sup> Electropherogram details of the normal genotype signal: added 3'-end nucleotide is color-coded to match peak color; average observed peak size is given in nt

<sup>g</sup> Electropherogram details of the mutant genotype signal, as in footnote f
