# Supplementary material for: Efficient Detection of Mediterranean β-Thalassemia Mutations by Multiplex Single-Nucleotide Primer Extension
Source: PubMed Central journal article supplement (PMC3482202; doi:10.1371/journal.pone.0048167), 2012-10-26
Supplement: pone.0048167.s004.pdf [file pone.0048167.s004.pdf]

**Table S2.** List of reagents and solutions.

| Reagent/solution                                                                                                                                                                                                                                                                            | Used for                                                             | Supplier, details, comments                                                        |
|---------------------------------------------------------------------------------------------------------------------------------------------------------------------------------------------------------------------------------------------------------------------------------------------|----------------------------------------------------------------------|------------------------------------------------------------------------------------|
| Primer 5'-GCCAAGGACAGGTACGGCTGTCATC-3'                                                                                                                                                                                                                                                      | PCR amplification of 1856 bp <i>HBB</i> fragment – forward primer    | Any supplier of synthetic DNA oligonucleotides, purification by standard desalting |
| Primer 5'-GTATTTTCCCAAGGTTTGAAGTAGCTC-3'                                                                                                                                                                                                                                                    | PCR amplification of 1856 bp <i>HBB</i> fragment – reverse primer    | Any supplier of synthetic DNA oligonucleotides, purification by standard desalting |
| Thermostable DNA polymerase with reaction buffer and MgCl <sub>2</sub> stock solution                                                                                                                                                                                                       | PCR amplification of 1856 bp <i>HBB</i> fragment                     | Any supplier of molecular biology products                                         |
| dATP, dCTP, dGTP, dTTP                                                                                                                                                                                                                                                                      | PCR amplification of 1856 bp <i>HBB</i> fragment                     | Any brand, PCR grade                                                               |
| Agarose                                                                                                                                                                                                                                                                                     | Quality control of PCR product by agarose electrophoresis (optional) | Any brand, molecular biology grade                                                 |
| TBE buffer (10 × TBE: 900 mM Tris, 900 mM boric acid, 20 mM EDTA)                                                                                                                                                                                                                           | Quality control of PCR product by agarose electrophoresis (optional) | Prepare stock solution                                                             |
| ExoSAP-IT                                                                                                                                                                                                                                                                                   | PCR product clean-up                                                 | GE Healthcare USB, Product Number 78200                                            |
| Extension primer set: a total of 15 separate oligonucleotides <sup>a</sup>                                                                                                                                                                                                                  | Primer extension                                                     | Any supplier of synthetic DNA oligonucleotides, purification by standard desalting |
| 5 × Primer cocktail: 8 μM IVS-I-1+, 12 μM Codon 8-, 1.5 μM IVS-I-110-, 0.5 μM IVS-I-110+, 2 μM IVS-I-1-, 0.3 μM Codon 39-, 12 μM IVS-I-6+, 6 μM Codon 5+, 4 μM Codon 6/S+, 4 μM IVS-II-745+, 4 μM Codon 6/S-, 4 μM Codon 5-, 2 μM Codon 39+, 4 μM IVS-I-6-, 0.5 μM IVS-II-745- <sup>b</sup> | Primer extension                                                     | Prepare stock solution                                                             |
| ABI PRISM SNaPshot Multiplex Kit                                                                                                                                                                                                                                                            | Primer extension                                                     | Life Technologies, Product Number 4323159A                                         |
| Shrimp Alkaline Phosphatase with reaction buffer                                                                                                                                                                                                                                            | Primer extension                                                     | Affymetrix USB, Product Number 70092 or equivalent                                 |
| HiDi Formamide                                                                                                                                                                                                                                                                              | Analysis of extension products                                       | Life Technologies, Product Number 4311320                                          |
| GeneScan 120 LIZ Size Standard                                                                                                                                                                                                                                                              | Analysis of extension products                                       | Life Technologies, Product Number 4322362                                          |
| Consumables for fragment analysis by capillary electrophoresis                                                                                                                                                                                                                              | Analysis of extension products                                       | Follow the recommendations of the instrument manufacturer                          |

<sup>a</sup> Primer sequences listed in Table 2<sup>b</sup> Primer names as in Table 2
